1 **Enhancing the translational capacity of *E. coli* by resolving the codon bias**

2

3 **Running head: Enhanced translational capacity *E. coli* strain**

4

5 Zoltan Lipinszki<sup>a,b</sup>, Viktor Vernyik<sup>a</sup>, Nora Farago<sup>c</sup>, Tobias Sari<sup>a</sup>, Laszlo G. Puskas<sup>c</sup>, Frederick R.  
6 Blattner<sup>d</sup>, Gyorgy Posfai<sup>a, #</sup> and Zsuzsanna Gyorfy<sup>a,#</sup>

7

8 <sup>a</sup>Institute of Biochemistry, Biological Research Centre of the Hungarian Academy of Sciences,  
9 Szeged, Hungary

10 <sup>b</sup>MTA SZBK Lendület Laboratory of Cell Cycle Regulation, Biological Research Centre of the  
11 Hungarian Academy of Sciences, Szeged, Hungary

12 <sup>c</sup>Institute of Genetics, Biological Research Centre of the Hungarian Academy of Sciences,  
13 Szeged, Hungary

14 <sup>d</sup>Scarab Genomics LLC, Madison, WI, USA

15

16 #Address correspondence to Zsuzsanna Gyorfy, [gyorfyzs@brc.hu](mailto:gyorfyzs@brc.hu); Gyorgy Posfai,  
17 [posfai.gyorgy@brc.mta.hu](mailto:posfai.gyorgy@brc.mta.hu).

18

19 Word count of the abstract: 209

20 Word count of the text: 4034

21

## 22 **Abstract**

23

24 *Escherichia coli* is a well-established, and popular host for heterologous expression of proteins.

25 The preference in the choice of synonymous codons (codon bias), however, might differ for the

26 host and the original source of the recombinant protein, constituting a potential bottleneck in

27 production. Codon choice affects the efficiency of translation by a complex and poorly

28 understood mechanism. The availability of certain tRNA species is one of the factors that may

29 curtail the capacity of translation.

30 Here we provide a tRNA-overexpressing strategy that allows the resolution of the codon bias, and

31 boosts the translational capacity of the popular host BL21(DE3) when rare codons are

32 encountered. In BL21(DE3)-derived strain, called SixPack, copies of the genes corresponding to

33 the six least abundant tRNA species have been assembled in a synthetic fragment and inserted

34 into a ribosomal RNA operon. This arrangement, while not interfering with the growth properties

35 of the new strain, allows dynamic control of the transcription of the extra tRNA genes, providing

36 significantly elevated levels of the rare tRNAs in exponential growth phase.

37 Results from expression assays of a panel of heterologous proteins of diverse origin and codon

38 composition showed that the performance of SixPack surpassed that of the parental BL21(DE3)

39 or a related strain equipped with a rare tRNA-expressing plasmid.

40

## 41 **Importance**

42

43 Codon composition not fitting the codon bias of the expression host frequently compromises the

44 efficient production of foreign proteins in *E. coli*. Various attempts to remedy the problem (codon

45 optimization by gene synthesis, expression of rare tRNAs from a plasmid) proved to be

46 unsatisfying. Our new approach, adjusting the tRNA pool by co-expressing extra copies of rare  
47 tRNA genes with ribosomal RNA genes, does not affect normal cell physiology, and seems to be  
48 a superior solution in terms of simplicity, cost, and yield.

49

## 50 **Introduction**

51

52 *E. coli* is by far the most widely used host organism for biopharmaceutical heterologous  
53 production of recombinant proteins. This expression platform is favored for its simplicity, speed,  
54 and low cost. The codon bias discrepancy, however, can seriously hinder protein expression in *E.*  
55 *coli* (1-5). Choice in the usage of synonymous codons can be different in various organisms, and  
56 this bias has been shown to correlate with the relative and absolute quantities of individual tRNAs  
57 (6,7). Heterologous expression of a protein with a high ratio of codons occurring infrequently in  
58 *E. coli* might deplete the corresponding tRNA species, leading to translational frameshifting,  
59 codon skipping, misincorporations, and protein truncations (8). Ultimately, the codon bias  
60 seriously limits the use of *E. coli* as an expression platform.

61

62 To overcome this problem, codon optimization or rare tRNA overexpression strategies have been  
63 applied, with limited success. On one hand, synthesis of the recombinant protein encoding gene  
64 with an *E. coli* codon preference is labor-intensive and expensive. Moreover, replacing rare  
65 codons with frequent ones does not necessarily lead to increased yield in protein synthesis. Codon  
66 choice might affect expression, solubility, and folding of a protein (9-12); and rare codons can,  
67 paradoxically, enhance the translation of a gene via reducing the mRNA secondary structure  
68 (7,13,14). Additionally, codon optimization by gene synthesis is not feasible when testing gene  
69 libraries. On the other hand, attempts to overexpress rare tRNA species by cloning extra copies of

70 the corresponding tRNA encoding genes into a plasmid have their drawbacks as well. In such  
71 commercially available hosts, maintenance of the tRNA-expressing plasmid requires the addition  
72 of extra antibiotics (usually the protein synthesis inhibitor chloramphenicol); moreover, the  
73 recombinant protein-encoding expression plasmid must belong to a different complementation  
74 group. Using two antibiotics and/or permanently altering the balance of the various tRNA species  
75 can have a fitness cost on the host, eventually resulting in a low success rate in applications  
76 (10,15).

77  
78 We sought to resolve the codon bias problem by expressing rare tRNAs in a more dynamic  
79 fashion. We hypothesized that inserting extra copies of the relevant tRNA genes into a ribosomal  
80 RNA (*rrn*) operon would harmonize their expression with the translational activity and would  
81 provide enhanced levels of rare tRNAs according to the actual needs. *rrn* operons have key roles  
82 in bacterial physiology and economy. Synthesis of rRNA quickly reacts to environmental  
83 conditions, determining ribosome availability via regulating the expression of ribosomal proteins  
84 by a translational feedback mechanism (16). In *E. coli*, there are seven nearly identical copies of  
85 rRNA operons. Synthesis of rRNA is driven by the strongest promoters found in the genome  
86 (17), and the rate of transcription can change more than an order of magnitude between poor and  
87 rich nutrient conditions (18). While most of the tRNA genes are scattered around the  
88 chromosome, all rRNA operons carry certain (but not any of the rare) tRNA genes as well, co-  
89 transcribed with the rRNA genes.

90  
91 We inserted extra copies of the six tRNA genes (*argX*, *glyT*, *leuW*, *proL*, *argU*, and *ileX*)  
92 corresponding to the minor codons of *E. coli* (CGG, GGA, CUA, CCC, AGA/AGG, and AUA,  
93 respectively) into one of the ribosomal RNA operons (*rrnD*) of BL21(DE3), the widely used *E.*

94 *coli* expression host. We demonstrated that expression of these tRNA genes varies with growth  
95 rate and shows a marked increase compared to the unmodified host. By testing the expression of a  
96 panel of recombinant proteins with a high ratio of rare codons in their genes, we showed that, in  
97 most cases, the modified strain named SixPack performs better and shows significantly enhanced  
98 expression of the heterologous proteins in classical IPTG-induction as well as in an auto-  
99 induction system. Moreover, compared to the commercially available strain Rosetta2(DE3)pLysS  
100 (Merck), which carries a similar array of extra tRNA genes on a plasmid (pLysSRARE2; Merck),  
101 SixPack proves to be a superior expression platform.

102

## 103 **Results**

104

### 105 **Design and genomic insertion of extra copies of tRNA genes**

106 Hypothetically, cloning extra copies of the genes corresponding to rare tRNAs into a *rrn* operon  
107 allows their controlled expression, as the activity of the operon is tightly regulated by nutrient  
108 availability and other physiological conditions (19). This might ensure that expression of the rare  
109 tRNAs does not cause a permanent extra burden for the cell.

110

111 The genes encoding for the six least abundant tRNA species were combined in a single, synthetic  
112 DNA fragment. The original copies of these genes are either single genes whose expression is  
113 controlled by their own promoter (*proL*, *argU*, or *ileX*), or are parts of polycistronic operons  
114 (*argX*, *glyT*, or *leuW*) (Fig. S1). Since the process of maturation of the primary transcripts of  
115 tRNA genes is not thoroughly understood, the nucleotide sequences surrounding the genes in the  
116 synthetic fragment were designed to mimic the natural tRNA operons. The intergenic and  
117 flanking regions of the *argX-glyT-leuW-proL* segment were essentially identical to those of the

118 natural *argX-hisR-leuT-proM* polycistronic operon. For *argU* and *ileX*, exact copies of the genes  
119 and their flanking sequences were fused to the 3' end of the segment (Fig. S2).

120

121 For the genomic insertion site *rrnD*, one of the seven *rrn* operons was selected. Although the  
122 structure, sequence, and activity of the *rrn* operons of *E. coli* are very similar, the 3' end of *rrnD*  
123 (containing *trhV* and *rrfF*) is unique, allowing specific targeting of the locus (17).

124

125 The 1207-base synthetic operon carrying the six tRNA genes was engineered into the 3' region of  
126 *rrnD* (Fig. 1) by a multistep process using  $\lambda$ RED recombineering, followed by elimination of the  
127 markers via CRISPR-Cas9-stimulated homologous recombination (Fig. S3), resulting in strain  
128 SixPack.

129

### 130 **Growth properties of SixPack and control strains**

131 Apparently, insertion of the extra tRNA genes into *rrnD* did not disturb the homeostasis of the  
132 cell. The growth parameters of SixPack were identical to those of the parental BL21(DE3) in both  
133 LB and AIM (auto-induction medium). Noticeably, the commercially available  
134 Rosetta2(DE3)pLysS strain had a longer lag phase, lower growth rate, and lower maximum OD  
135 in both media, presumably owing to the burden of maintaining the plasmid and the presence of  
136 the antibiotic chloramphenicol in the media (Fig. 2 and Table S1).

137

### 138 **Elevated expression of rare tRNAs**

139 Expression of the six rare tRNA genes was measured by qRT-PCR on first-strand cDNA  
140 generated from total RNA isolated from cultures of BL21(DE3) and SixPack in the exponential  
141 phase ( $OD_{600} = 0.45$ ) and in the early stationary phase ( $OD_{600} = 4.5$ ). Primers were designed to

142 amplify both the unprocessed and the matured forms of the various tRNA species. In the case of  
143 SixPack, the measured rare tRNAs represented transcripts originating both from their original  
144 genomic copies and from the newly inserted fragment in *rrnD*. The rare tRNA ratios were  
145 normalized with the ratios of three control (abundant) tRNA species.

146

147 Compared to parental BL21(DE3), SixPack showed elevated expression of the six rare tRNAs.  
148 The difference was more pronounced in the exponential phase (1.4- to 3.8-fold) than in the  
149 stationary phase (0.8- to 3.0-fold) (Fig. 3).

150

151 Despite being on the same cistron and transcribed together, increases in the expression levels of  
152 the extra tRNA genes were diverse (*proL* showing the highest and *glyT* the lowest increase). This  
153 might be due to several factors, including tRNA processing, stability, regulation, and diverse  
154 expression levels of the original genomic copies.

155

### 156 **Individual impact of elevated levels of the rare tRNAs on protein expression**

157 The functional effect of the increased levels of rare tRNAs was first tested separately for each  
158 tRNA species. To magnify the effect of rare tRNAs, we constructed IPTG-inducible, pETDuet-1-  
159 based (Novagen) test plasmids expressing modified versions of the GFP gene under the  
160 regulation of the T7 promoter. GFP genes carrying runs of rare codons corresponded to each of  
161 the six extra tRNA genes (one GFP version corresponding to *proL*, *ileX*, *argX*, *glyT*, and *leuW*  
162 each, and two GFP versions for *argU*, as it relates to both AGA and AGG codons). The tandem  
163 rare codons (3 or 5 copies) were inserted into the GFP gene immediately after the beginning ATG  
164 codon. Expressions of the modified GFPs were detected by fluorescence measurements and  
165 visualized by denaturing polyacrylamide gel electrophoresis (SDS-PAGE).

166  
167 IPTG- (or lactose-) induced expression of the GFP and its variants with rare codons had a  
168 negative but diverse impact on the growth of the strains. In LB medium, SixPack and BL21(DE3)  
169 usually showed similar growth patterns, and in most cases displayed higher growth parameters  
170 than Rosetta2(DE3)pLysS. In AIM, peculiarly, Rosetta2(DE3)pLysS reached the highest  
171 maximal optical density when GFP variants with rare codons were expressed (Fig. S4 and S5).

172  
173 Total fluorescence measurements of GFP production, however, showed a clear advantage of  
174 SixPack in both LB (Fig. 4) and AIM (Fig. S6). In both media, SixPack showed higher  
175 expression of the modified GFPs than the parental BL21(DE3) did. In one exception, there was  
176 no difference (3xGGA-GFP; GGA codon relates to *glyT*) (Fig. S6H). Compared to  
177 Rosetta2(DE3)pLysS, SixPack showed higher expression in all cases.

178  
179 Results of the fluorescence measurements were further supported by protein gel assays. Equal  
180 amounts of proteins obtained from crude extracts of cultures collected after a 10-h incubation  
181 were analyzed on Coomassie Brilliant Blue-stained SDS-PAGE gels. Differences in the amounts  
182 of modified GFPs in the three strains were in clear correlation with the fluorescence data (Fig.  
183 S7).

184  
185 **Heterologous protein expression performance of SixPack and control strains**  
186 The usefulness of SixPack was further tested by expressing a panel of eight protein-coding genes  
187 of diverse length and rare codon content (Table S2), selected from various species, including  
188 *Drosophila melanogaster*, *Pyrococcus furiosus*, *Saccharomyces cerevisiae*, *Streptococcus*



189 *pyogenes*, and human papillomavirus (HPV). The genes were cloned into pETDuet-1 and  
190 expressed in SixPack and control strains under two different conditions (LB and AIM).  
191  
192 The growth curves of IPTG- (or lactose-) induced cultures seemed to be quite diverse in LB (Fig.  
193 S8), but rather uniform in AIM (Fig. S9). Production of the specific proteins was visualized by  
194 using Coomassie-stained gels and Western blotting (Fig. 5). In most cases, SixPack proved to be  
195 the best producer. This was especially evident when the ratio of rare codons was higher than 8%  
196 (and the ratio of tandems was also high), as in the cases of HumdCas9 (dCas9 optimized to  
197 human codon preference), HumdCas9-GFP fusion, and *Pfu* DNA polymerase. In the case of  
198 EFT1, the ratio was only 4.3% (35 AGA and 2 CTA codons); but SixPack still produced the  
199 highest amount of this protein. It is conceivable that the translation efficiency is influenced not  
200 only by the total amount of rare codons, but also by the occurrence of tandem situations, the  
201 location of rare codons in the gene (e.g., close or far from the start site), and the ratios of the  
202 different rare codon species (3). In other cases (Asl, dCas9, Flfl, and HPV16 L2), when the rare  
203 codon ratio was below 8%, production by SixPack was similar to that of BL21(DE3) in LB and  
204 similar to or better than that in AIM. In all cases, the performance of Rosetta2(DE3)pLysS lagged  
205 behind that of SixPack (especially evidently in AIM) or was similar at most (Fig. 6).

206

## 207 **Discussion**

208

209 Depletion of rare tRNA species evoked by the expression of heterologous proteins can  
210 compromise product yield and translational fidelity. Several attempts, both genetic  
211 (overexpression of rare tRNA genes from a plasmid, or codon optimization of the heterologous  
212 gene by synthesis) and non-genetic ones (optimizing the growth conditions, or using *in vitro*

213 protein synthesis systems) have been applied with varying degrees of success (20-23). We offer  
214 here a solution that resolves codon bias discrepancies with a high success rate, does not require  
215 additional antibiotics, and performs better or as well as the widely used BL21(DE3) *E. coli* strain.

216  
217 The novelty of the approach lies in placing the extra copies of rare tRNA genes into a ribosomal  
218 operon of the host chromosome. This arrangement offers the following benefits related to the rare  
219 tRNA expression: (i) lack of physiological burden associated with plasmid replication and  
220 maintenance; (ii) genetic stability without the use of an antibiotic; and (iii) dynamic changes in  
221 the levels of rare tRNAs, paralleling the actual translational activity. Consequently, elevated  
222 levels of rare tRNAs are achieved with minimal interference with normal host physiology.

223  
224 A ribosomal operon is a natural choice as a location for inserting tRNA genes. While most tRNA  
225 genes are scattered elsewhere in the genome, each of the *rrn* operons carries at least one tRNA  
226 gene (typically coding for abundant tRNAs). Among the seven *rrn* operons, *rrnD* is particularly  
227 suited for insertion of the extra genes, as it carries unique regions near its 3' end, allowing easy  
228 targeting. In this vein, a synthetic segment carrying the genes of the six least abundant tRNAs of  
229 *E. coli* (*argX*, *glyT*, *leuW*, *proL*, *argU*, *ileX*) was cloned into *rrnD*, downstream of its own tRNA  
230 gene *thrV*.

231  
232 As anticipated, increased amounts of the rare tRNAs, corresponding to the inserted genes, were  
233 detected by qRT-PCR. Moreover, their levels showed a growth phase-dependent adjustment  
234 (higher in exponential phase, lower in stationary phase). However, when compared to the levels  
235 detected in the parental host BL21(DE3), the rate of increase in the exponential phase was only  
236 modest (1.4- to 3.8-fold), especially when considering the wide dynamic range of *rrn* transcripts

237 across the growth cycle. An interplay of several factors, including co-factors of tRNA maturation,  
238 tRNA stability, and feedback regulation of the genes at the original locations, might mitigate the  
239 increase.

240  
241 Although the increase in the abundance of the rare tRNAs did not interfere with cell growth, it  
242 had a significant, positive effect on heterologous protein expression. Individually, with the  
243 exception of *glyT* in AIM, all the genes caused increased expression (up to 12-fold) of specific  
244 GFP variants carrying tandem copies of the corresponding rare codon. The combined effect of the  
245 six extra genes was then clearly demonstrated by expressing a panel of proteins of various origin  
246 and codon bias. Expression in SixPack (amount of target protein per cell mass or per culture  
247 volume) was at least as good as in any of the control strains and in fact, was better in most cases  
248 (in some cases even 20-fold). In general, with the increasing number of rare codons and their  
249 tandem copies, the advantage of SixPack became increasingly evident. SixPack compared  
250 especially favorably to control strains when applying AIM, which is a popular medium for  
251 biotechnological production of proteins in large volumes (i.e., in bioreactors) (24).

252  
253 Insertion of the six rare tRNA genes into the genome of BL21(DE3) did not result in changes in  
254 its basic characteristics like morphology, growth properties, or transformation efficiency. The  
255 beneficial features (no need for extra plasmid and antibiotics, no need for codon optimization,  
256 simplicity when expressing gene libraries, high success rate when expressing proteins with  
257 different codon bias) render SixPack a useful, and likely superior, alternative host for expression  
258 of heterologous proteins.

259

260 **Materials and Methods**

261

## 262 **Medium**

263 In all experiments involving bacterial culture growth, standard LB or AIM (auto-induction  
264 medium; LB broth base including trace elements; Formedium LTD, England) were used.

265 Antibiotics were used in the following concentrations: 100 µg/ml ampicillin (Ap) and 24 µg/ml  
266 chloramphenicol (Cam).

267

## 268 ***E. coli* strains**

269 BL21(DE3) was used as the parental strain. It expresses T7 RNA polymerase from the λDE3  
270 lysogen inserted into the genome under the regulation of the *lacUV5* promoter. This polymerase  
271 can drive the expression of the genes of interest via the T7 promoter (25).

272 Rosetta2(DE3)pLysS is a derivative of BL21(DE3). In this strain, pLysSRARE2 plasmid encodes  
273 seven genes of rare tRNAs (*argU*, *argX*, *argW*, *glyT*, *leuW*, *ileX*, and *proL*, recognizing the  
274 AGA/AGG, CGG, AGG, GGA, CUA, AUA, and CCC codons, respectively) under the control of  
275 their own promoter. pLysSRARE2 also contains chloramphenicol resistance- and lysosyme-  
276 encoding genes. Due to constitutive lysosyme expression, the T7 polymerase-driven expression  
277 of the genes of interest is lower in Rosetta2(DE3)pLysS than in BL21(DE3) or SixPack (26).

278 To create the SixPack strain, BL21(DE3) was modified by inserting extra copies of six rare tRNA  
279 genes (*argU*, *argX*, *glyT*, *leuW*, *ileX*, and *proL*) into its *rrnD* operon (Fig. 1). These tRNAs  
280 recognize the same rare codons as the tRNAs expressed from the pLysSRARE2 plasmid (AGG is  
281 recognized by *argX* and *argW* in Rosetta2(DE3)pLysS, but only by *argX* in SixPack).

282

## 283 **Genomic construct**

284 The rare tRNA genes were cloned into pSG76A (replicating by R6K ori) in three pieces. The first  
285 part (synthesized by Thermo Fisher Scientific GENEART GmbH; Germany) contained the *argX*,  
286 *glyT*, *leuW*, and *proL* tRNA genes. The structure of this DNA fragment was based on the  
287 polycistronic operon of *E. coli* coding for *argX*, *hisR*, *leuT*, and *proM* tRNA genes; we replaced  
288 the *hisR*, *leuT*, and *proM* genes with *glyT*, *leuW*, and *proL* rare tRNA genes, but kept *argX* and  
289 the original intergenic regions. The second and third pieces coding for *argU* and *ileX*,  
290 respectively, were directly amplified from the *E. coli* genome with their own intergenic regions  
291 (Fig. S1 and S2).

292 The plasmid carrying the six tRNA genes was linearized by PCR using overhanging primers  
293 containing homologous regions (50- or 100-nt) with the target site (unique sequence of the 3' end  
294 of *rrnD*), and transformed into BL21(DE3) in the presence of  $\lambda$ RED recombinase (27). After  
295 successful recombination into the genome, the CRISPR-Cas9 system was used to introduce a  
296 double-strand brake in the ampicillin resistance gene on the insert (28). The cells' own RecA  
297 system repaired the cleavage by homologous recombination using the 47-nt box on the plasmid  
298 homologous to the adjacent *rrnD* sequence downstream from the site of insertion (29) (Fig. S3  
299 and S10).

300

### 301 **Expression plasmids**

302 The coding sequences of different test proteins were cloned into pETDuet-1 (Novagen). A list of  
303 these genes and the cloning sites is given in Table S3.

304 The GFP-encoding gene was amplified from pCA24N (the cloning plasmid of the ASKA  
305 collection; 30), and subcloned into pETDuet-1. GFP gene variants containing runs of rare codons  
306 were created by PCR using pETDUET/GFP as a template.

307 The coding DNA sequence of asterless (*Asl*) was subcloned from the GH02902 *Drosophila* Gold  
308 cDNA clone into pETDuet-1 following standard procedures.  
309 Cloning of *Flf1* into pETDuet-1 has been described elsewhere (31).  
310 dCas9 was cloned from the pdCas9 plasmid # 46569 from Addgene (32).  
311 The HumdCas9 gene was amplified from pMLM3705 plasmid # 47754 from Addgene (33).  
312 pETDUET/HumdCas9-GFP expresses HumdCas9 and GFP as a fusion protein.  
313 EFT1, the gene of elongation factor 2, was amplified from genomic DNA of *Saccharomyces*  
314 *cerevisiae* strain EMY 74.7 (34) and was a kind gift from Dr. Tamas Feher.  
315 The HPV16 L2 gene (subcloned in Addgene plasmid # 72473) was a kind gift from Dr. Vilmos  
316 Tubak.  
317 The gene of *Pfu* DNA polymerase was amplified from *Pyrococcus furiosus* genomic DNA (DSM  
318 3638) which was a kind gift from Dr. Vilmos Tubak.  
319 BL21(DE3) harbouring an empty pETDuet-1 was used as a control.

320

### 321 **Quantitative real-time PCR (qRT-PCR)**

322 RNA was isolated from exponential phase ( $OD_{600} = 0.45$ ) and early stationary phase ( $OD_{600} =$   
323  $4.5$ ) cultures grown in LB, using the E.Z.N.A. Bacterial RNA Kit (VWR, USA). To obtain  
324 cDNA, 1  $\mu$ g of RNA was then reverse transcribed using the High-Capacity cDNA Reverse  
325 Transcription Kit (Thermo Fisher Scientific) in a final volume of 10  $\mu$ l by using 1 pmole of the  
326 reverse primers (Table S4). After dilution with 20  $\mu$ l of water, 1  $\mu$ l of the diluted reaction mixture  
327 was used as a template in qRT-PCR with 10  $\mu$ l of qPCRBIO SyGreen Mix (PCR Biosystems) and  
328 1  $\mu$ l of gene-specific primer mix, according to the following protocol: 10 min at 95°C followed  
329 by 40 cycles of 95°C for 25 sec, 60°C for 25 sec, and 72°C for 15 sec. qRT-PCR was performed

330 in a LightCycler® Nano Real-Time PCR System (Roche Diagnostics GmbH; Mannheim,  
331 Germany). Transcripts of *proK*, *alaU*, and *gltW* genes were used as house-keeping tRNA probes.

332

### 333 **Measuring and calculating growth parameters**

334 To measure growth parameters, a Synergy 2 automated microplate reader machine (BioTek,  
335 USA) was used. Aliquots of 1 µl each of BL21(DE3), SixPack, and Rosetta2(DE3)pLysS  
336 overnight starter cultures were transferred into 100 µl fresh LB or AIM medium in dedicated 96-  
337 well plates. Rosetta2(DE3)pLysS cultures were supplemented with Cam. Absorbance at 600 nm  
338 was measured every 5 min for 24 h at 37°C with continuous shaking. Growth parameters (length  
339 of the lag phase and the doubling time) were calculated by using previously described methods  
340 (35).

341

### 342 **Fluorescence measurements**

343 Starter cultures of BL21(DE3), SixPack, and Rosetta2(DE3)pLysS strains expressing GFP or  
344 GFP variants were grown overnight in LB in a Synergy 2 automated microplate reader machine  
345 (BioTek, USA). Starter cultures (1 µl each) were re-inoculated into 100 µl fresh LB or AIM  
346 media supplemented with Ap and isopropyl β-D-1-thiogalactopyranoside (IPTG) (plus Cam, in  
347 the case of Rosetta2(DE3)pLysS). IPTG was used in concentrations optimized for highest  
348 induction (0.05 mM for BL21(DE3) and SixPack, 0.5 mM for Rosetta2(DE3)pLysS).  
349 Measurements were made every 5 min.

350

### 351 **Protein expression and whole cell lysate preparation**

352 Protein expressions in BL21(DE3) and SixPack were induced with 0.05 mM IPTG, and those in  
353 Rosetta2(DE3)pLysS were induced with 0.5 mM IPTG in 3ml of LB or AIM (supplemented with  
354 antibiotics) for 10 h. Bacteria were harvested by centrifugation, resuspended in 150  $\mu$ l/absorption  
355 unit (at 600 nm) of phosphate-buffered saline, pH 7.4, supplemented with 1 U/ml  
356 BenzonaseNuclease (Merck) and 2 mM MgCl<sub>2</sub>, kept on ice for 10 min, and then mixed with 4x  
357 Laemmli sample buffer and boiled for 5 min.

358

### 359 **SDS-PAGE and Western blotting**

360 Equal amounts of protein samples were run on 7% or 10% SDS-PAGE gels. Gels were fixed for  
361 10 min in 10% acetic acid, stained for 15 min with Coomassie Brilliant Blue (0.1% CBB in 50%  
362 methanol and 10% acetic acid), and differentiated overnight in 7% acetic acid and 10% methanol.  
363 For immunoblotting, proteins were blotted onto a nitrocellulose membrane (GE Healthcare) and  
364 probed with anti-His mouse monoclonal (Thermo Fisher Scientific, #MA1-21315; dilution 1:3-  
365 5000), anti-Flfl rat polyclonal (31) (dilution 1: 15,000), or anti-Asl rabbit polyclonal (36)  
366 (dilution 1: 20,000) antibodies following standard procedures. Stained gels and X-ray films were  
367 scanned at 600 dpi resolution for image processing.

368

### 369 **Funding**

370

371 This work was supported by The National Research, Development and Innovation Office (OTKA  
372 K116455 to GyP and OTKA-PD115404 to ZL), the Ministry for National Economy of Hungary  
373 (GINOP-2.3.2-15-2016-00001), and the Hungarian Academy of Sciences (Bolyai Fellowship,  
374 bo\_329\_15 to ZL).

375



376 **Acknowledgements**

377  
378 The authors would like to thank Dr. Vilmos Tubak for the *Pirococcus furiosus* genomic DNA and  
379 the HPV16 L2-expressing plasmid, and Dr. Tamas Feher for the EFT1-coding plasmid.

380

381 **References**

382

- 383 1. Deana A, Ehrlich R, Reiss C. 1998. Silent mutations in the *Escherichia coli ompA* leader  
384 peptide region strongly affect transcription and translation *in vivo*. *Nucleic Acids Res* 26:4778-  
385 4782.
- 386 2. Novy R, Drott D, Yaeger K, Mierendorf R. 2001. Overcoming the codon bias of *E. coli* for  
387 enhanced protein expression. *Innovations, Newsletter of Novagen, Inc.* 12:1–4.
- 388 3. Kim S, Lee SB. 2006. Rare codon clusters at 5'-end influence heterologous expression of  
389 archaeal gene in *Escherichia coli*. *Protein Expr Purif* 50:49–57.
- 390 4. Harris RP Kilby PM. 2014. Amino acid misincorporation in recombinant biopharmaceutical  
391 products. *Curr Opin Biotechnol* 30:45–50.
- 392 5. Boël G, Letso R, Neely H, Price WN, Wong KH, Su M, Luff J, Valecha M, Everett JK, Acton  
393 TB, Xiao R, Montelione GT, Aalberts DP, Hunt JF. 2016. Codon influence on protein  
394 expression in *E. coli* correlates with mRNA levels. *Nature* 529:358-363.
- 395 6. Ikemura T. 1981. Correlation between the abundance of *Escherichia coli* transfer RNAs and  
396 the occurrence of the respective codons in its protein genes: a proposal for a synonymous codon  
397 choice that is optimal for the *E. coli* translational system. *J Mol Biol* 151:389-409.
- 398 7. Novoa EM, Ribas de Pouplana L. 2012. Speeding with control: codon usage, tRNAs, and  
399 ribosomes. *Trends Genet* 28:574-581.

- 400 8. McNulty DE, Claffee BA, Huddleston MJ, Kane JF. 2003. Mistranslational errors associated  
401 with the rare arginine codon CGG in *Escherichia coli*. *Protein Expr Purif* 27:365–374.
- 402 9. Thangadurai C, Suthakaran P, Barfal P, Anandaraj B, Pradhan SN, Boneya HK, Ramalingam  
403 S, Murugan V. 2008. Rare codon priority and its position specificity at the 5' of the gene  
404 modulates heterologous protein expression in *Escherichia coli*. *Biochem Biophys Res Commun*  
405 376:647–652.
- 406 10. Kudla G, Murray AW, Tollervey D, Plotkin JB. 2009. Coding-sequence determinants of gene  
407 expression in *Escherichia coli*. *Science* 324:255-258.
- 408 11. Rosano GL, Ceccarelli EA. 2009. Rare codon content affects the solubility of recombinant  
409 proteins in a codon bias-adjusted *Escherichia coli* strain. *Microb Cell Fact* 8:41.
- 410 12. Mauro VP, Chappell SA. 2014. A critical analysis of codon optimization in human  
411 therapeutics. *Trends Mol Med* 20:604-613.
- 412 13. Goodman DB, Church GM, Kosuri S. 2013. Causes and effects of N-terminal codon bias in  
413 bacterial genes. *Science* 342:475-479.
- 414 14. Karimi Z, Nezafat N, Negahdaripour M, Berenjian A, HemmatiS, Ghasemi Y. 2015. The  
415 effect of rare codons following the ATG start codon on expression of human granulocyte-  
416 colony stimulating factor in *Escherichia coli*. *Protein Expr Purif* 114:108-114.
- 417 15. Sogaard KM, Nørholm MH. 2016. Side effects of extra tRNA supplied in a typical bacterial  
418 protein production scenario. *Protein Sci* 25:2102-2108.
- 419 16. Nomura M, Yates JL, Dean D, Post LE. 1980. Feedback regulation of ribosomal protein gene  
420 expression in *Escherichia coli*: structural homology of ribosomal RNA and ribosomal protein  
421 mRNA. *Proc Natl Acad Sci U S A* 77:7084–7088.
- 422 17. Jin DJ, Cagliero C, Zhou YN. 2012. Growth rate regulation in *Escherichia coli*. *FEMS*  
423 *Microbiol Rev* 36:269–287.

- 424 18. Milo R, Phillips R. 2015. Cell biology by the numbers. Garland Science. ISBN13  
425 9780815345374
- 426 19. Paul BJ, Ross W, Gaal T, Gourse RL. 2004. rRNA transcription in *Escherichia coli*. Annu Rev  
427 Genet 38:749–770.
- 428 20. Burgess-Brown NA, Sharma S, Sobott F, Loenarz C, Oppermann U, Gileadi O. 2008. Codon  
429 optimization can improve expression of human genes in *Escherichia coli*: A multi-gene study.  
430 Protein Expr Purif 59:94–102.
- 431 21. Hutterer KM, Zhang Z, Michaels ML, Belouski E, Hong RW, Shah B, Berge M,  
432 Barkhordarian H, Le E, Smith S, Winters D, Abrosion F, Hecht R, Liu J. 2012. Targeted codon  
433 optimization improves translational fidelity for an Fc fusion protein. Biotechnol Bioeng  
434 109:2770-2777.
- 435 22. Chen H, Xu Z, Cen P. 2006. High-level expression of human beta-defensin-2 gene with rare  
436 codons in *E. coli* cell-free system. Protein Pept Lett 13:155-162.
- 437 23. Chumpolkulwong N, Sakamoto K, Hayashi A, Iraha F, Shinya N, Matsuda N, Kiga D,  
438 Urushibata A, Shirouzu M, Oki K, Kigawa T, Yokoyama S. 2006. Translation of 'rare' codons  
439 in a cell-free protein synthesis system from *Escherichia coli*. J Struct Funct Genomics 7:31-36.
- 440 24. Studier FW. 2005. Protein production by auto-induction in high-density shaking cultures.  
441 Protein Expr Purif 41:207–234.
- 442 25. Studier FW, Rosenberg AH, Dunn JJ, Dubendorff JW. 1990. Use of T7 RNA polymerase to  
443 direct expression of cloned genes. Methods Enzymol 185:60-89.
- 444 26. Studier FW. 1991. Use of bacteriophage T7 lysozyme to improve an inducible T7 expression  
445 system. J Mol Biol 219:37-44.
- 446 27. Muyrers JP, Zhang Y, Testa G, Stewart AF. 1999. Rapid modification of bacterial artificial  
447 chromosomes by ET-recombination. Nucleic Acids Res 27:1555–1557.

- 448 28. Jiang W, Bikard D, Cox D, Zhang F, Marraffini LA. 2013. RNA-guided editing of bacterial  
449 genomes using CRISPR-Cas systems. *Nat Biotechnol* 31:233-9.
- 450 29. Kowalczykowski SC. 2000. Initiation of genetic recombination and recombination-dependent  
451 replication. *Trends Biochem Sci* 25:156-165.
- 452 30. Kitagawa M, Ara T, Arifuzzaman M, Ioka-Nakamichi T, Inamoto E, Toyonaga H, Mori H.  
453 2005. Complete set of ORF clones of *Escherichia coli* ASKA library (a complete set of *E. coli*  
454 K-12 ORF archive): unique resources for biological research. *DNA Res* 12:291–299.
- 455 31. Lipinski Z, Lefevre S, Savoian MS, Singleton MR, Glover DM, Przewloka MR. 2015  
456 Centromeric binding and activity of Protein Phosphatase 4. *Nat Commun* 6:5894.
- 457 32. Bikard D, Jiang W, Samai P, Hochschild A, Zhang F, Marraffini LA. 2013. Programmable  
458 repression and activation of bacterial gene expression using an engineered CRISPR-Cas system.  
459 *Nucleic Acids Res* 41:7429-7437.
- 460 33. Maeder ML, Linder SJ, Cascio VM, Fu Y, Ho QH, Joung JK. 2013. CRISPR RNA-guided  
461 activation of endogenous human genes. *Nat Methods* 10:977-979.
- 462 34. Johnson RE, Torres-Ramos CA, Izumi T, Mitra S, Prakash S, Prakash L. 1998. Identification  
463 of *APN2*, the *Saccharomyces cerevisiae* homolog of the major human AP endonuclease *HAP1*,  
464 and its role in the repair of abasic sites. *Genes Dev* 12:3137–3143.
- 465 35. Warringer J, Ericson E, Fernandez L, Nerman O, Blomberg A. 2003. High-resolution yeast  
466 phenomics resolves different physiological features in the saline response. *Proc Natl Acad Sci*  
467 *U S A* 100:15724–15729.
- 468 36. Dzhindzhev NS, Yu QD, Weiskopf K, Tzolovsky G, Cunha-Ferreira I, Riparbelli M,  
469 Rodrigues-Martins A, Bettencourt-Dias M, Callaini G, Glover DM. 2010. Asterless is a  
470 scaffold for the onset of centriole assembly. *Nature* 467:714-718.
- 471

472 **Figure legends**

473  
474 Figure 1. Schematic picture of *rrnD* showing the six extra tRNA genes (dark blue) inserted in the  
475 3' end region between *thrV* and *rrfF*.

476  
477 Figure 2. Growth curves of SixPack and control strains BL21(DE3) (marked BL) and  
478 Rosetta2(DE3)pLysS (marked R) in LB (**A**) and in AIM (**B**). (Averages of three independent  
479 experiments.)

480  
481 Figure 3. Ratios of the different tRNA species between SixPack and BL21(DE3) in the  
482 exponential growth phase (black columns) and in the early stationary phase (gray columns).  
483 (Averages of two independent experiments, each comprising three technical repetitions.)

484  
485 Figure 4. Expression of GFP (**A**) and modified GFP versions (**B-H**) in BL21(DE3) (marked BL),  
486 SixPack, and Rosetta2(DE3)pLysS (marked R) in LB, monitored by fluorescence measurements.  
487 (The curves represent the averages of four independent experiments.)

488  
489 Figure 5. Production of eight heterologous proteins (**A-H** for AsI, dCas9, HumdCas9,  
490 HumdCas9-GFP fusion, EFT1, Flfl, HPV16 L2, and *Pfu*, respectively) detected on protein gels  
491 by Coomassie Brilliant Blue staining and Western blotting. Proteins were extracted from  
492 BL21(DE3) (marked BL), SixPack and Rosetta2(DE3)pLysS (marked R) after 10 h growth in LB  
493 or AIM.

494

495 Figure 6. Summary of heterologous protein production of BL21(DE3) (marked BL), SixPack, and  
496 Rosetta2(DE3)pLysS (marked R) measured in LB and AIM. The “+” and “-“ marks indicate the  
497 relative protein production of the strains. Table A is based on the maximal fluorescence values of  
498 GFP and GFP variants detected in the first 24 h after induction. Table B is based on results of  
499 Western blots - validated by densitometry (data not shown). Circles label the cases when SixPack  
500 performed better than the parental strain BL21(DE3).

501

## 502 Figures

503

504 Figure 1.

505

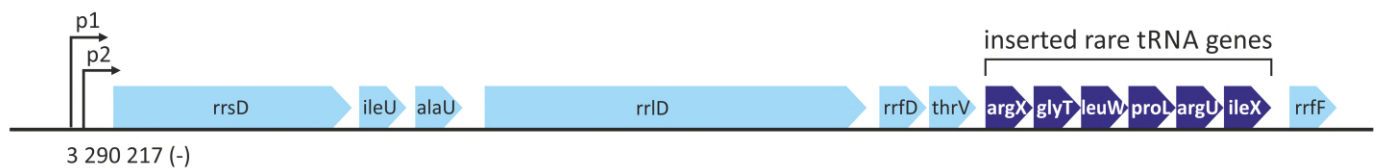

506

507

508 Figure 2.

509 A

510

511

512

513

514

515

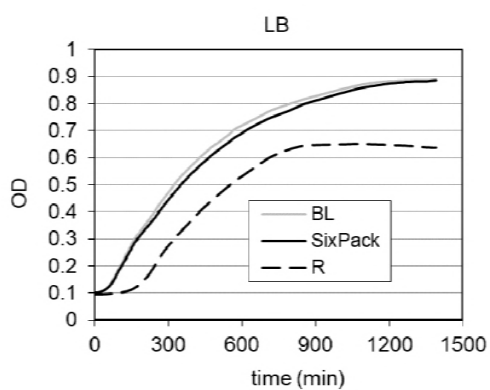

B

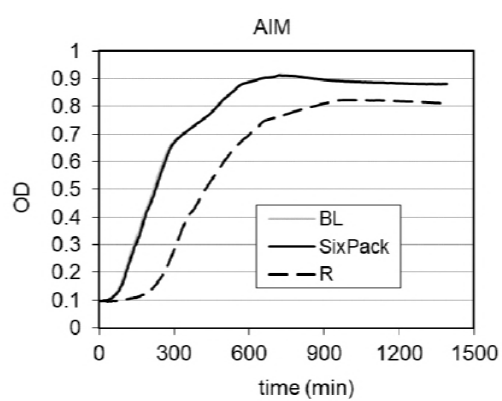

516 Figure 3.

517

518

519

520

521

522

523

524

525

526

527

528

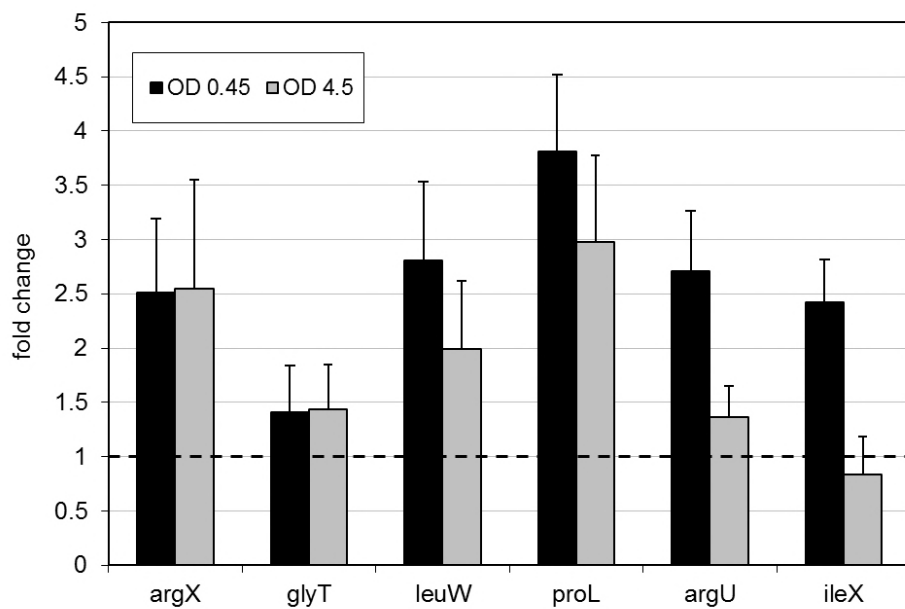

529 Figure 4.

530 A

B

C

531

532

533

534

535

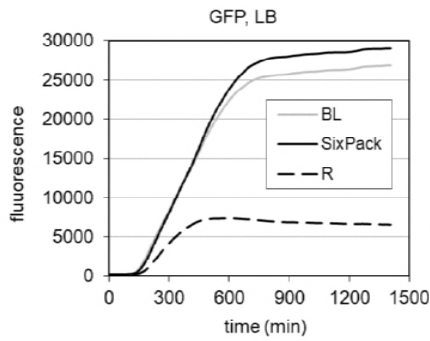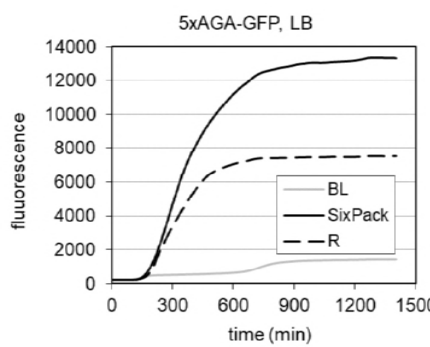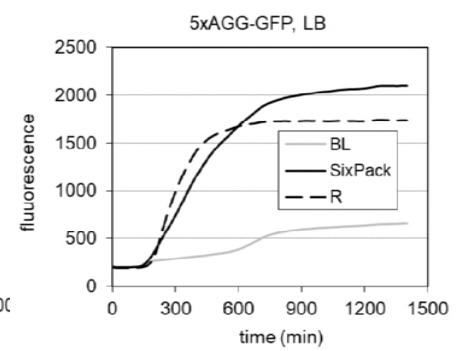

536 D

E

F

537

538

539

540

541

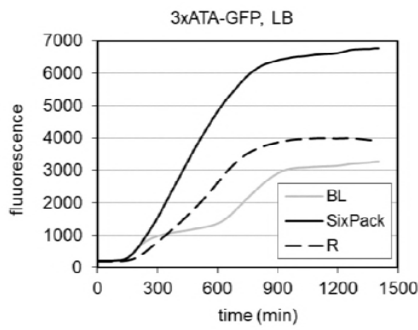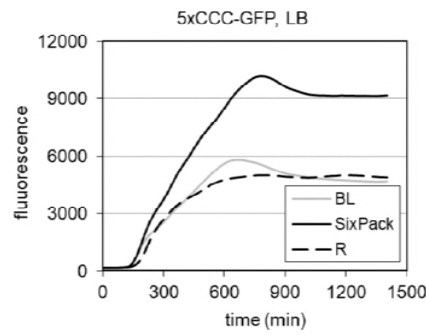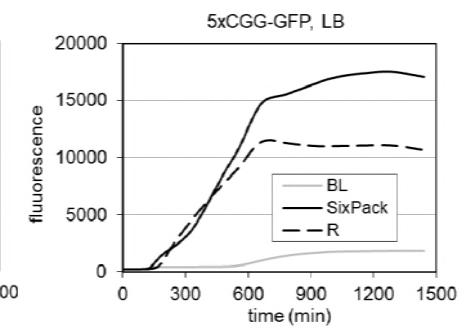

542 G

H

543

544

545

546

547

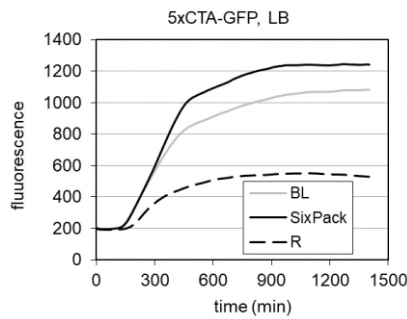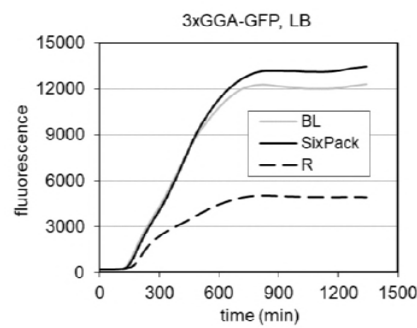

548

549

550

551

552



553 Figure 5.

554 A

555

556

557

558

559

560

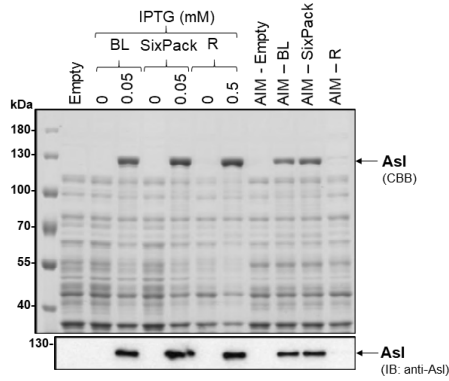

B

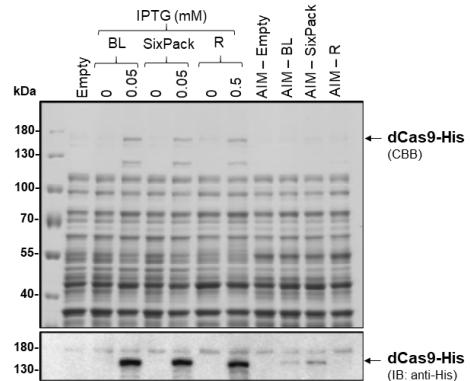

561 C

562

563

564

565

566

567

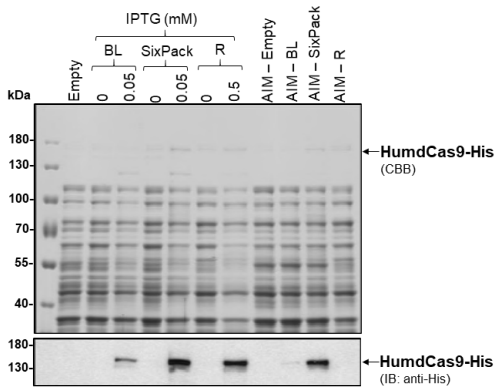

D

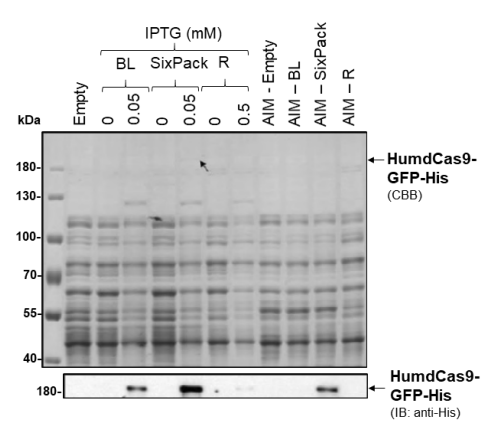

568 E

569

570

571

572

573

574

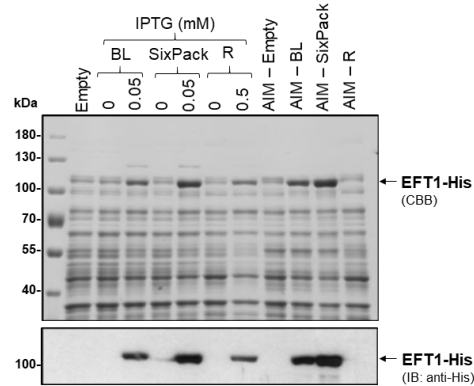

F

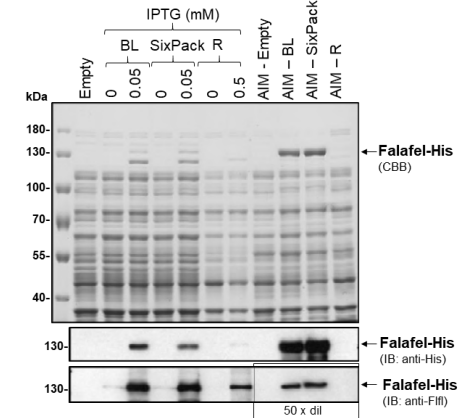

575

576

577 G

578

579

580

581

582

583

584

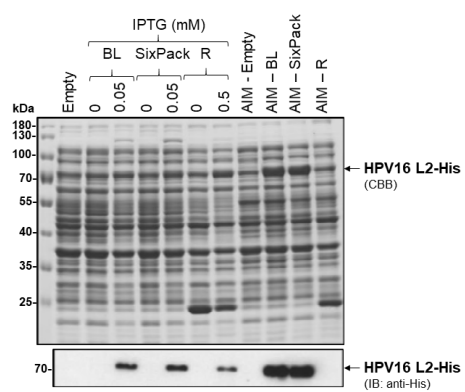

H

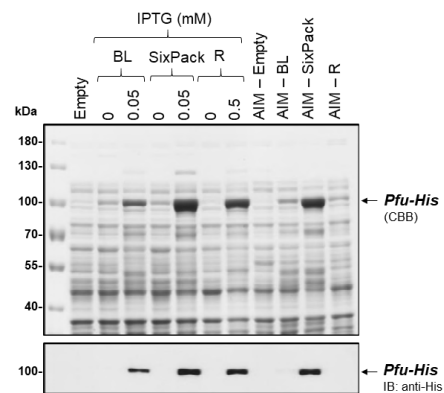

585 Figure 6.

586 A

|           | LB, IPTG |         |     | AIM |         |    |
|-----------|----------|---------|-----|-----|---------|----|
|           | BL       | SixPack | R   | BL  | SixPack | R  |
| GFP       | ++       | +++     | +   | +++ | +++     | -  |
| 5xAGA-GFP | +        | +++     | ++  | +   | +++     | +  |
| 5xAGG-GFP | +        | +++     | ++  | +   | +++     | ++ |
| 3xATA-GFP | +        | +++     | ++  | ++  | +++     | ++ |
| 5xCCC-GFP | ++       | +++     | ++  | +   | +++     | ++ |
| 5xCGG-GFP | +        | +++     | +++ | +   | +++     | ++ |
| 5xCTA-GFP | ++       | +++     | +   | ++  | +++     | +  |
| 3xGGA-GFP | ++       | +++     | +   | +++ | +++     | +  |

593 B

|              | LB, IPTG |         |     | AIM |         |   |
|--------------|----------|---------|-----|-----|---------|---|
|              | BL       | SixPack | R   | BL  | SixPack | R |
| <i>AsI</i>   | +++      | +++     | +++ | ++  | ++      | - |
| dCas9        | ++       | ++      | ++  | +   | ++      | - |
| HumdCas9     | +        | +++     | ++  | +   | +++     | - |
| HumdCas9-GFP | +        | +++     | -   | -   | ++      | - |
| EFT1         | ++       | +++     | +   | ++  | +++     | - |
| FifI         | ++       | ++      | +   | +++ | +++     | - |
| HPV16 L2     | ++       | ++      | +   | +++ | +++     | - |
| <i>Pfu</i>   | +        | +++     | ++  | -   | +++     | - |

600

601

602

603 **Supplementary figure legends**

604

605 Figure S1. Schematic picture of the *E. coli* BL21(DE3) genome showing the location and  
606 orientation of tRNA encoding genes (based on the BL21(DE3) complete genome sequence,  
607 CP001509.3). Circles label the rare tRNA species genes whose copies were inserted into *rrnD*.

608

609 Figure S2. Nucleotide sequence of the insert containing the six rare tRNA species genes (bold).  
610 Three incidental point mutations are underlined.

611

612 Figure S3. Main steps in the procedure for creating SixPack. The six tRNA genes and the 47-nt  
613 segment (filled orange box) homologous to the 3' end of *rrnD* were cloned into pSG76A (**I**). The  
614 plasmid was linearized by PCR using primers bearing overhanging regions (brown, orange lines)  
615 homologous to *rrnD* (brown, orange open boxes) (**II**) and recombined into the genome via the  
616 homologous overhangs (**III**). Plasmid sequences were then eliminated by CRISPR-Cas9  
617 cleavage-stimulated homologous recombination between the 47-nt fragment (filled orange box)  
618 and its downstream homologue (orange open box) (**IV**).

619

620 Figure S4. Growth curves of the strains expressing GFP (**A**) and different GFP variants (**B-H**) in  
621 LB medium. (The curves represent the averages of four independent experiments.)

622

623 Figure S5. Growth curves of the strains expressing GFP (**A**) and different GFP variants (**B-H**) in  
624 AIM. (The curves represent the averages of four independent experiments.)

625

626 Figure S6. Expression of GFP (**A**) and GFP variants (**B-H**) in BL21(DE3) (marked BL), SixPack,  
627 and Rosetta2(DE3)pLysS (marked R) in AIM monitored by fluorescence measurements. (The  
628 curves represent the averages of four independent experiments.)

629  
630 Figure S7. Production of GFP (**A**) and GFP variants (**B-H**) after 10 h growth in LB or AIM  
631 visualized on protein gels labeled by Coomassie Brilliant Blue staining.

632  
633 Figure S8. Growth curves of the strains expressing various heterologous proteins in LB.  
634 (The curves represent the averages of three independent experiments.)

635  
636 Figure S9. Growth curves of the strains expressing various heterologous proteins in AIM. (The  
637 curves represent the averages of three independent experiments.)

638  
639 Figure S10. Overhanging primers (**A** and **B**) used for linearization of the plasmid and  
640 recombination into the genome. The forward primer contained a 100-bp overhanging segment  
641 homologous to *rrnD* downstream from the site of insertion (brown). The reverse primer contained  
642 a 50-bp overhanging region homologous to *rrnD* upstream from the site of insertion (orange).  
643 The CRISPR-Cas9 targeting sequence (**C**) was cloned into pCRISPR plasmid (Addgene #42875)  
644 and used as crRNA targeting the Cas9 protein (expressed from Addgene #42876) to the  
645 ampicillin resistance gene of pSG76A.

646  
647 Table S1. Growth parameters of BL21(DE3) (marked BL), SixPack, and Rosetta2(DE3)pLysS  
648 (marked R) strains grown in LB and AIM.

649

650 Table S2. Size and rare codon composition of the ORFs of test proteins. SixPack showed more  
651 effective protein production than the parental strain BL21(DE3) when the ratio of rare codons  
652 was about 8% or more (labeled with circles). The efficient translation of EFT1 by SixPack might  
653 be due to the extremely high ratio of one rare codon species, AGA (labeled with rectangle).

654

655 Table S3. List of 16 protein-expressing plasmid (pETDuet-1) constructs and the cloning sites  
656 used.

657

658 Table S4. Primers used for qRT-PCR. *argX*, *glyT*, *leuW*, *proL*, *argU*, and *ileX* correspond to rare;  
659 *alaU*, *gltW* and *proK* correspond to abundant (control) tRNA species.
